# Supplementary material for: Genomic assessment reveals signal of adaptive selection in populations of the Spotted rose snapper Lutjanus guttatus from the Tropical Eastern Pacific
Source: PeerJ journal article supplement (doi:10.7717/peerj.15029), 2023-03-27

**A) Index of Association  
Neutral loci**

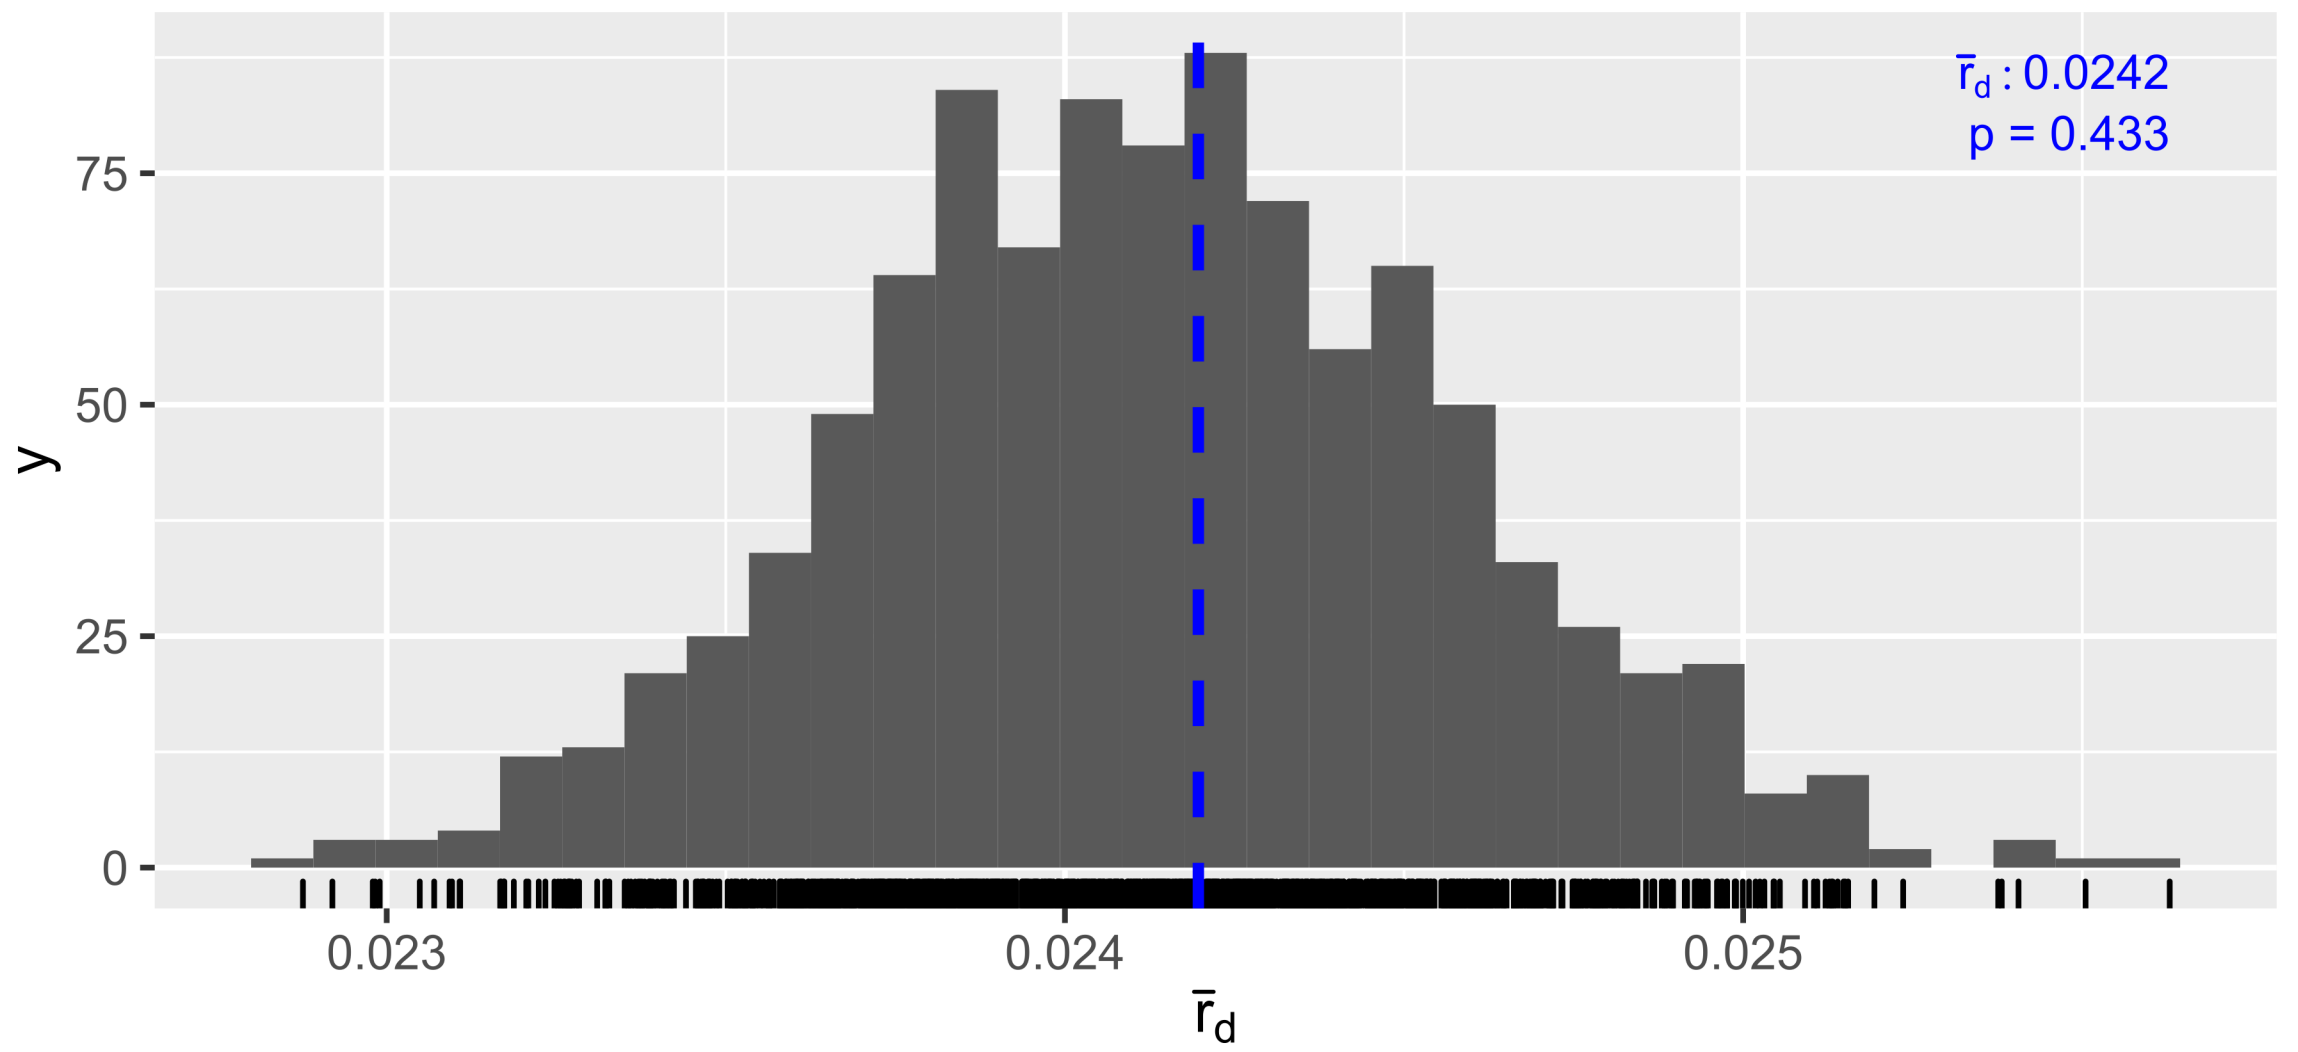

**B) Index of Association  
Outlier loci**

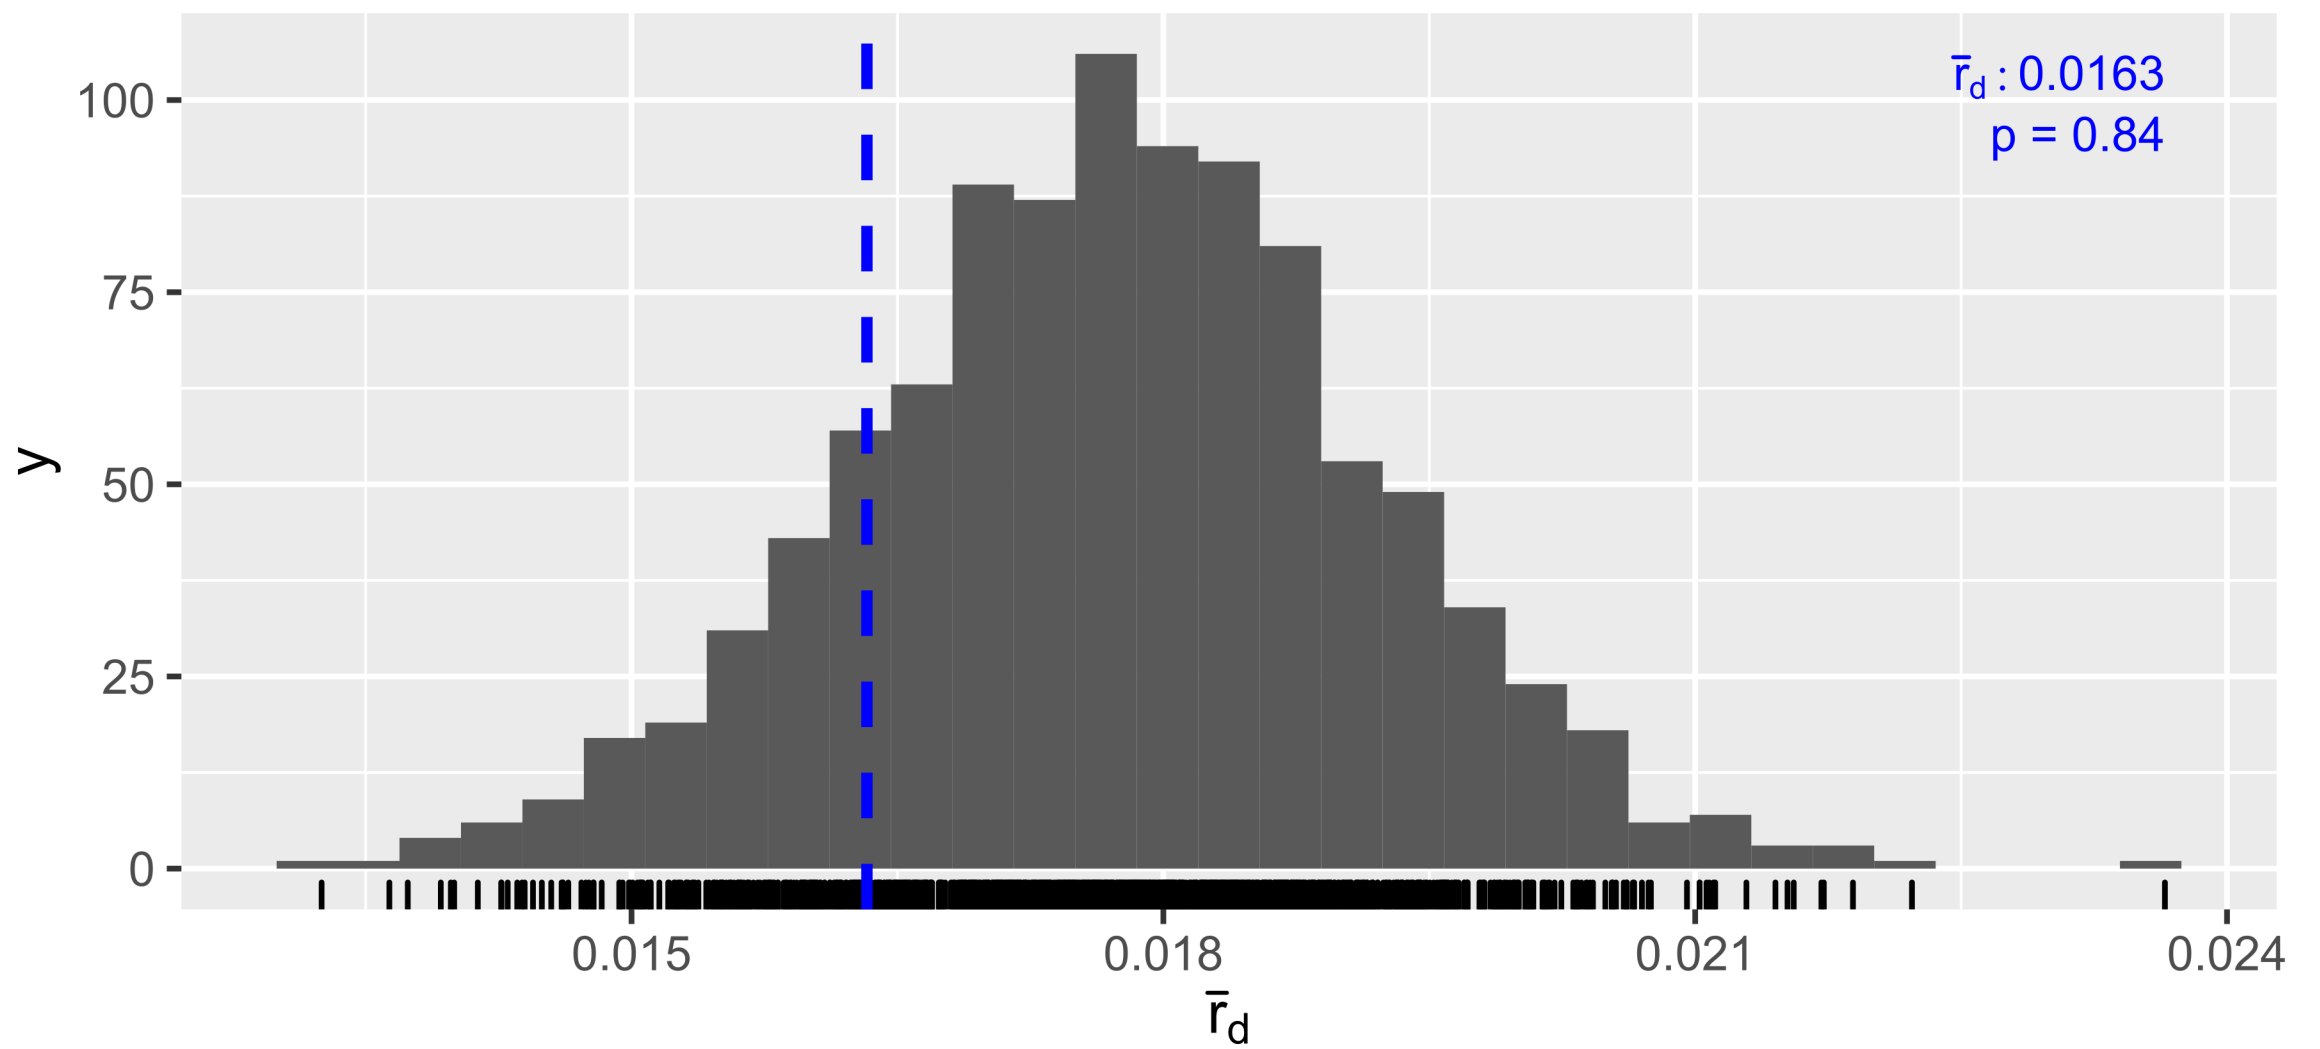

Supplement: FigS1.pdf [file FigS1.pdf]
