# Supplementary material for: Genomic assessment reveals signal of adaptive selection in populations of the Spotted rose snapper Lutjanus guttatus from the Tropical Eastern Pacific
Source: PeerJ journal article supplement (doi:10.7717/peerj.15029), 2023-03-27

## NEUTRAL LOCI

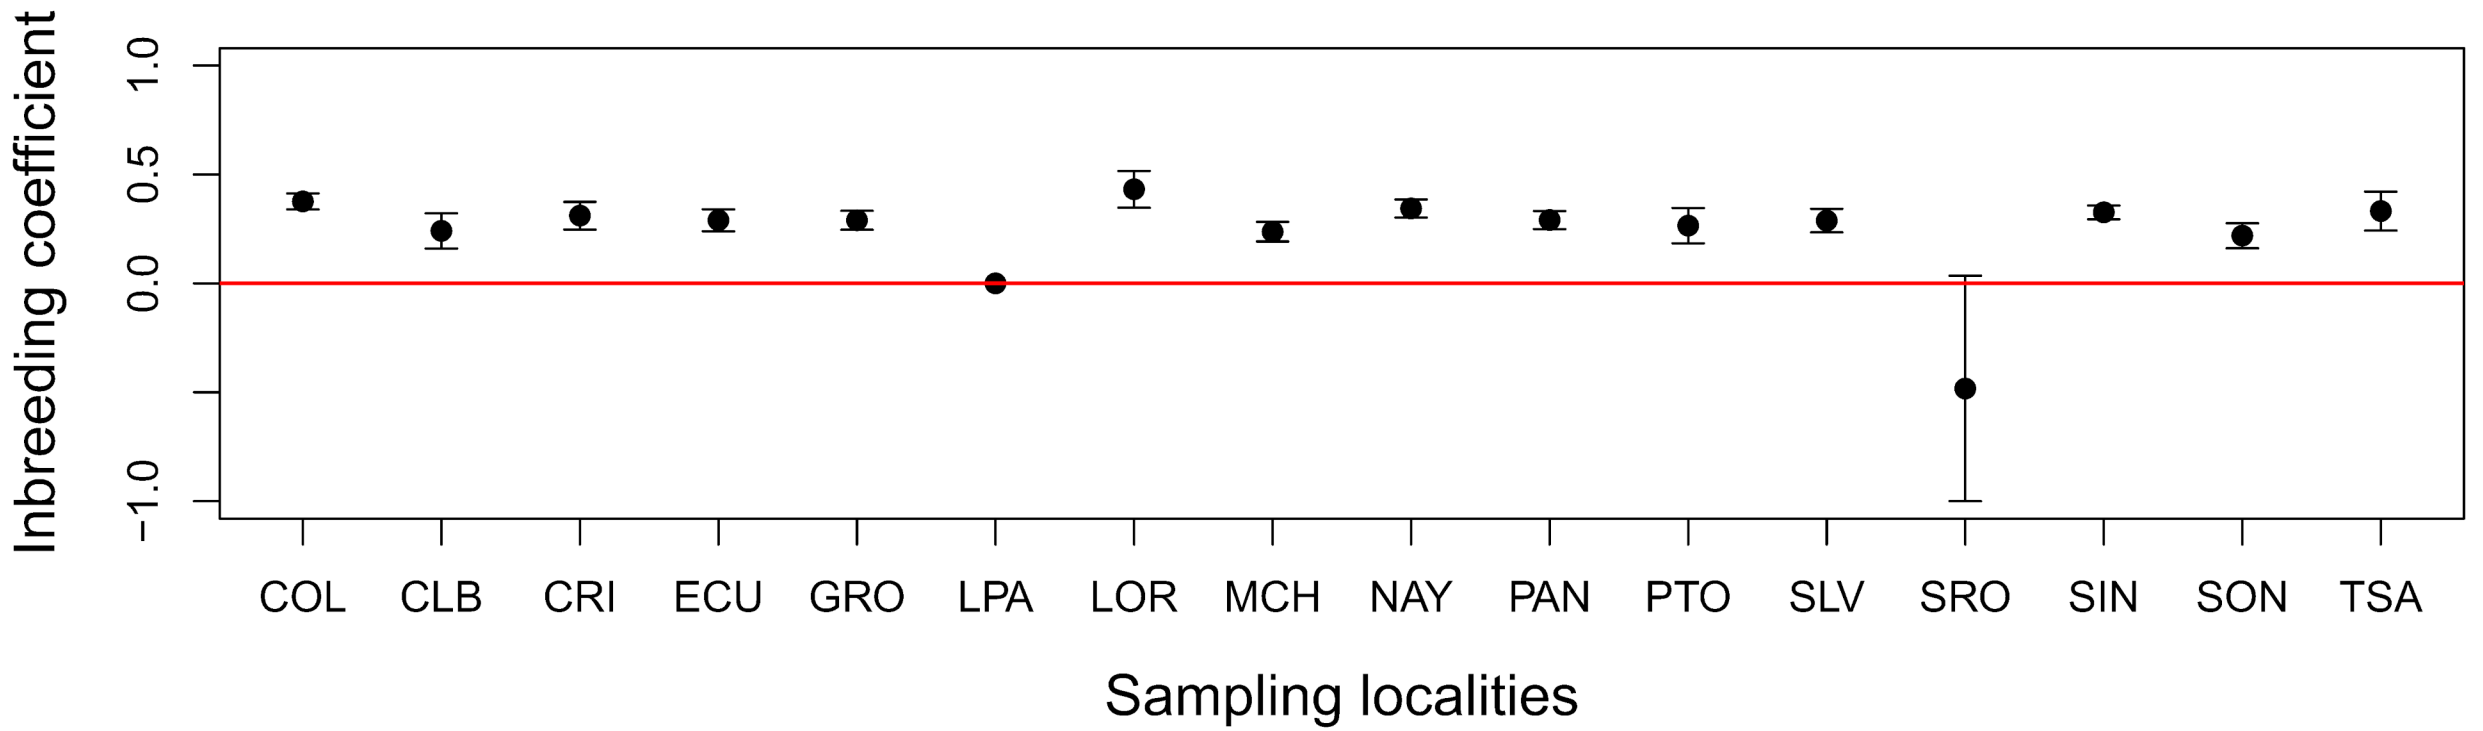

## OUTLIER LOCI

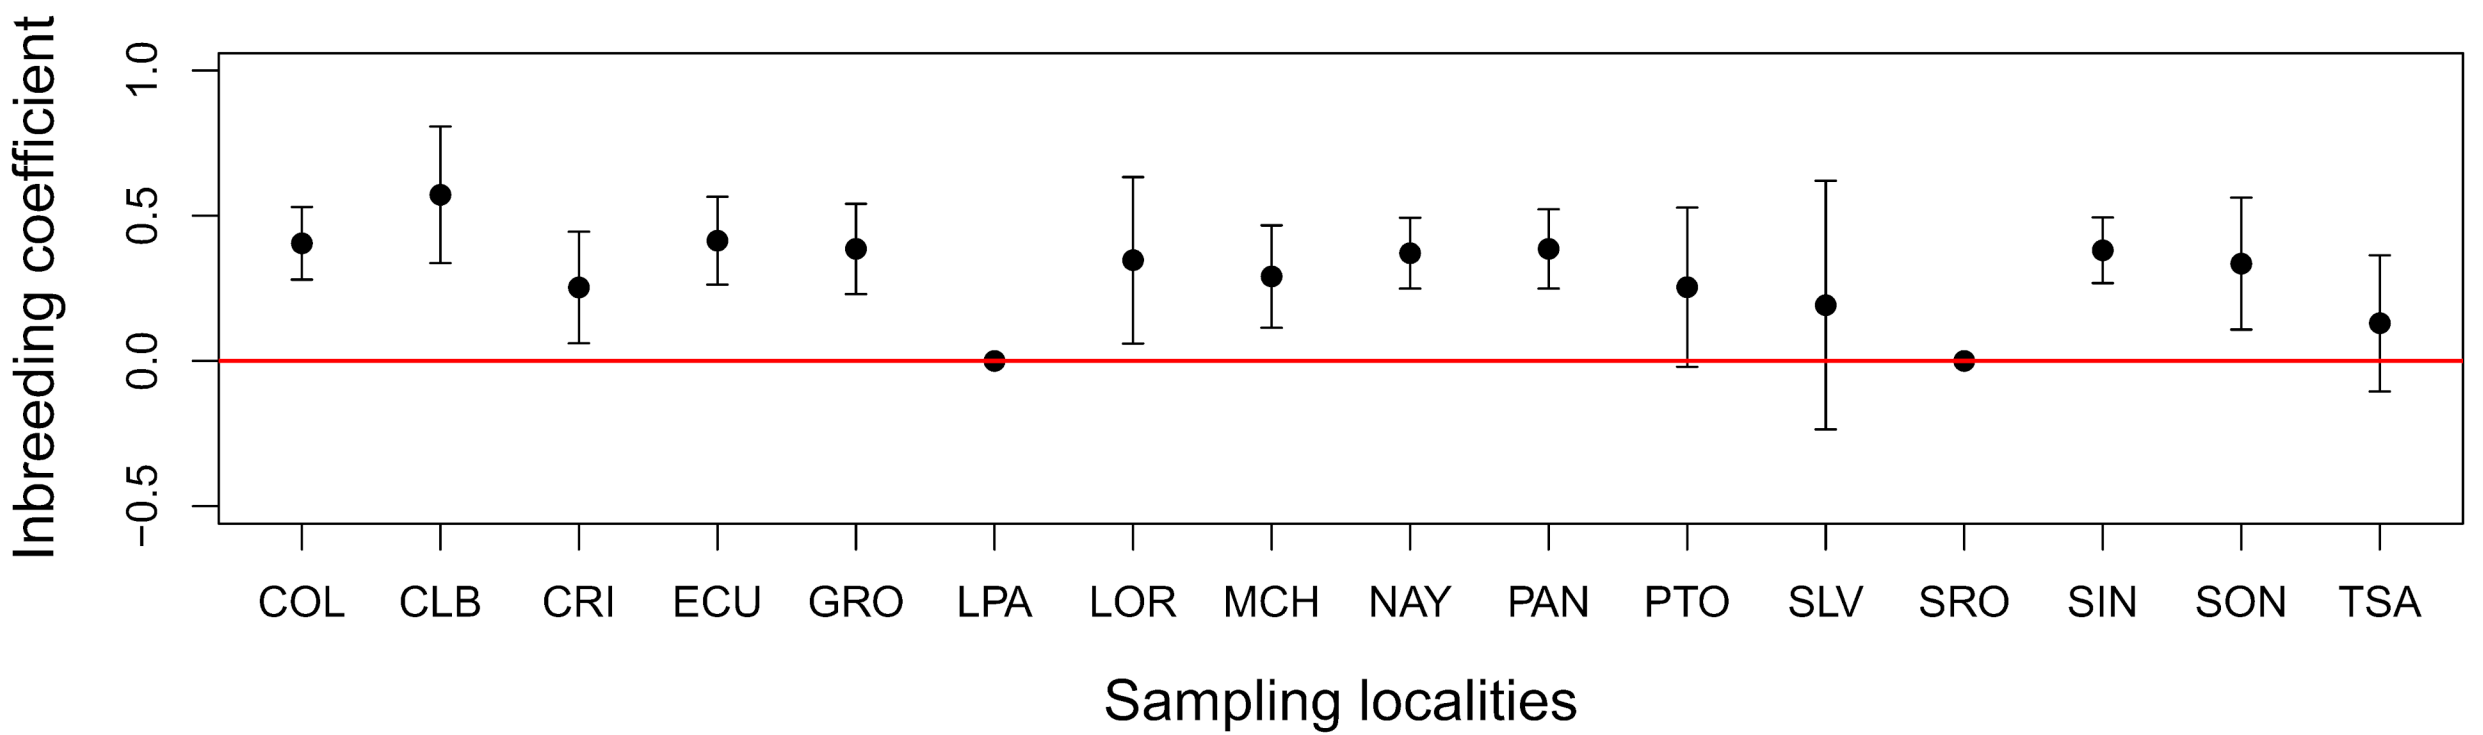

Supplement: FigS2.pdf [file FigS2.pdf]
