# Supplementary material for: Genomic assessment reveals signal of adaptive selection in populations of the Spotted rose snapper Lutjanus guttatus from the Tropical Eastern Pacific
Source: PeerJ journal article supplement (doi:10.7717/peerj.15029), 2023-03-27

### A) NEUTRAL LOCI

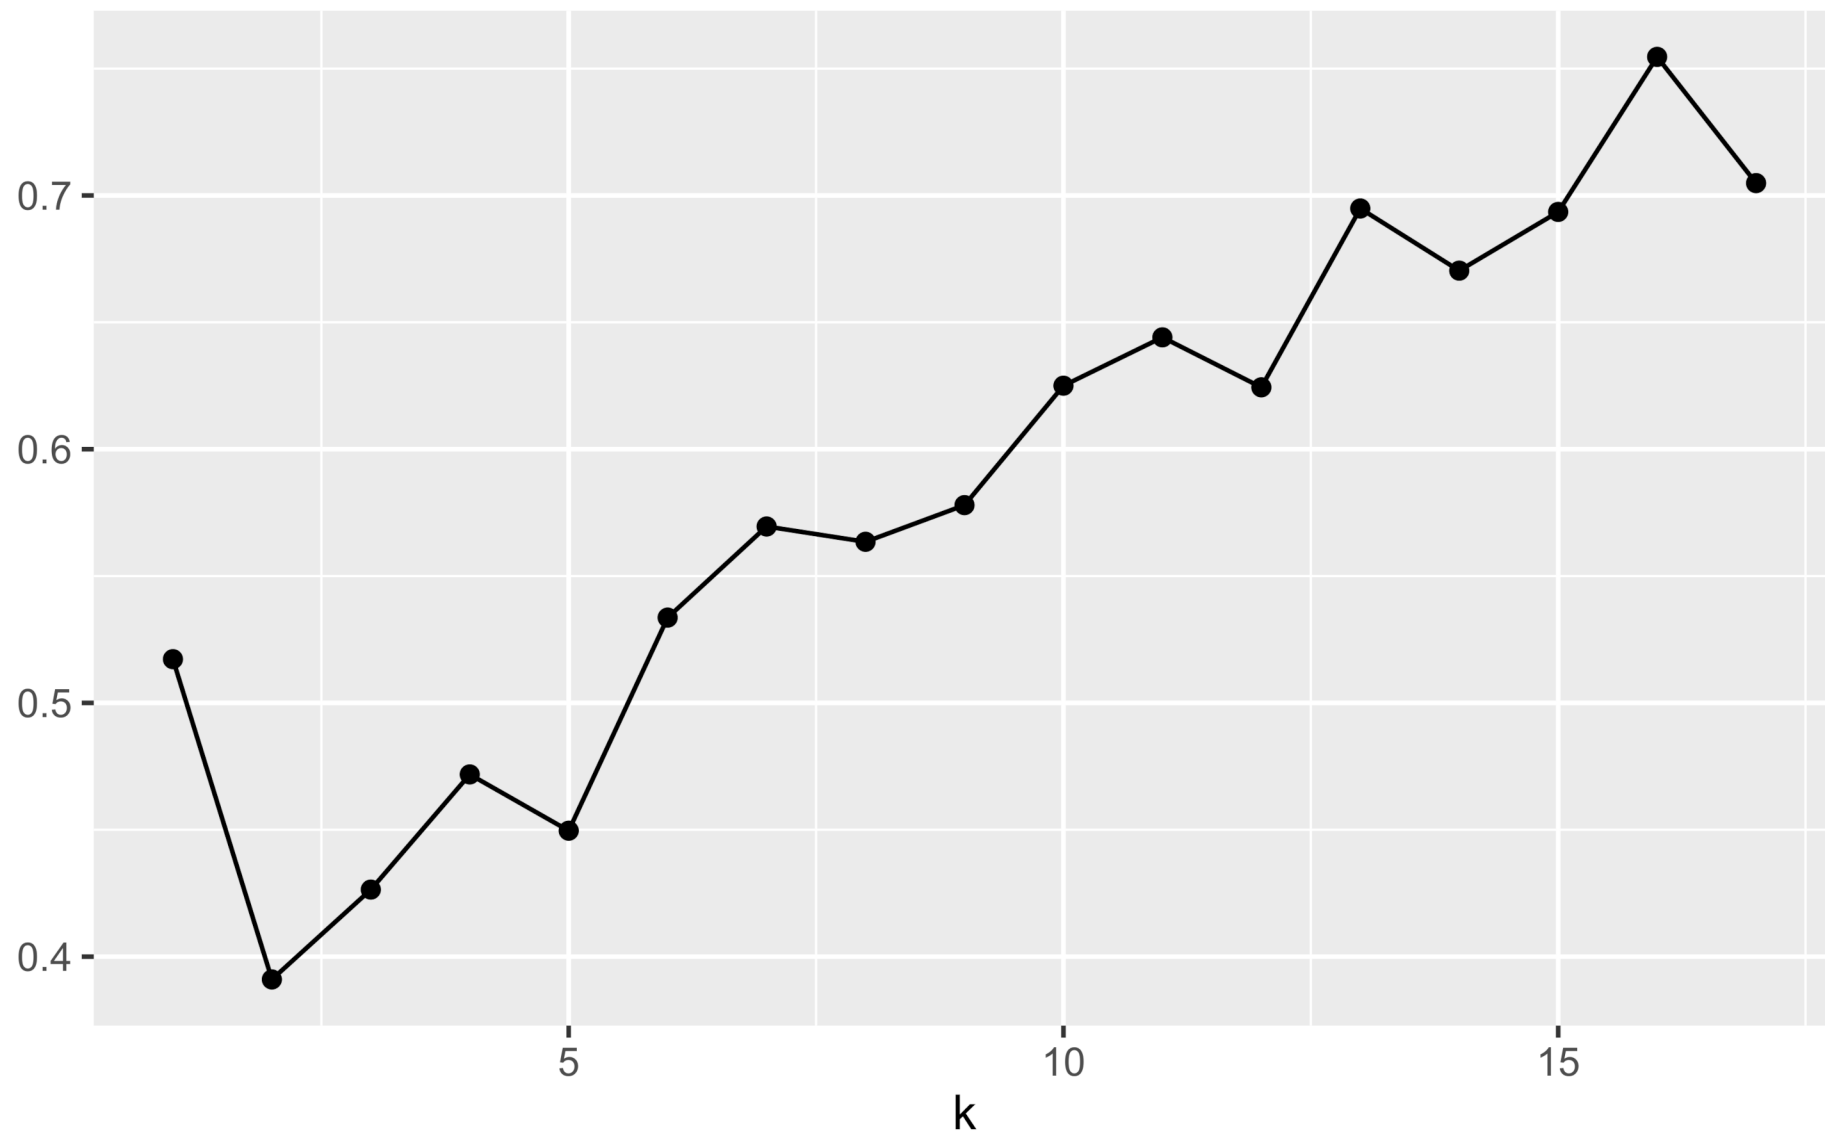

### B) OUTLIER LOCI

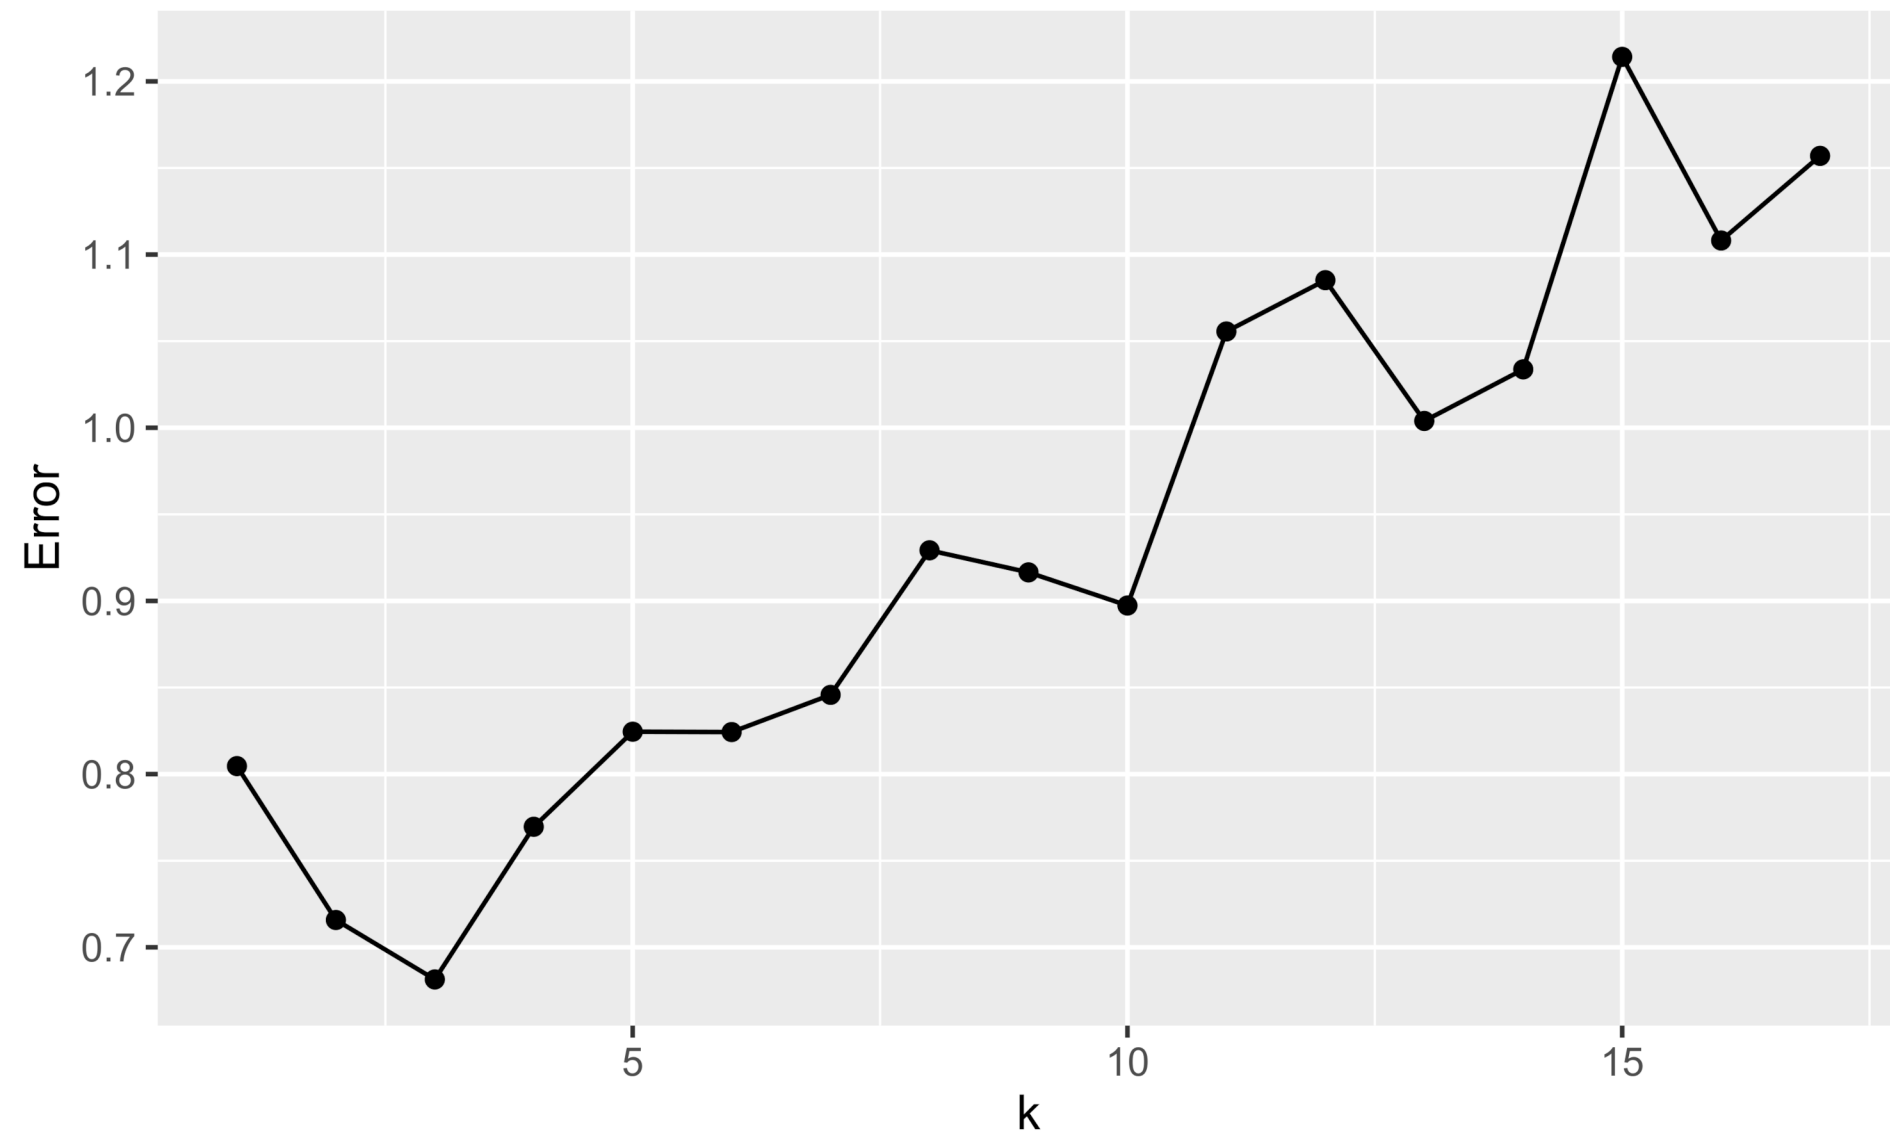

Supplement: FigS3.pdf [file FigS3.pdf]
