# Supplementary material for: Genomic assessment reveals signal of adaptive selection in populations of the Spotted rose snapper Lutjanus guttatus from the Tropical Eastern Pacific
Source: PeerJ journal article supplement (doi:10.7717/peerj.15029), 2023-03-27
Supplement: FigS4.pdf [file FigS4.pdf]

## A) IBD NEUTRAL LOCI

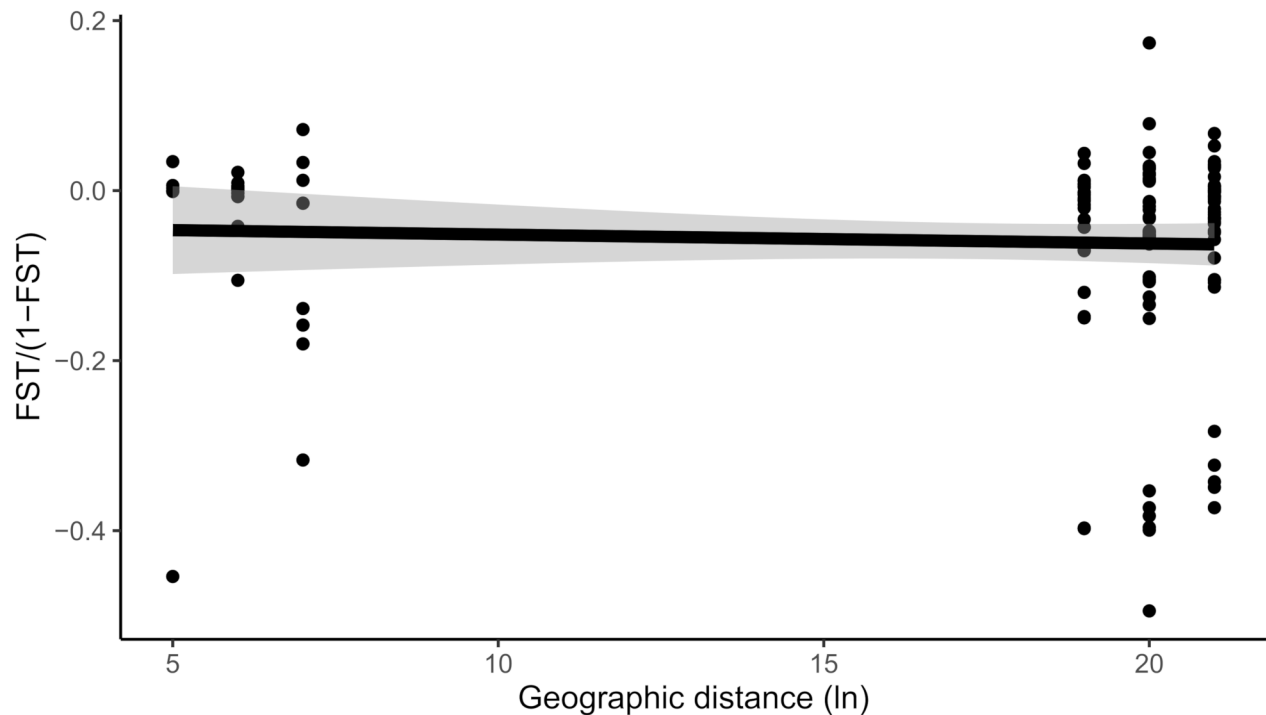

**$r = 0.0587$**   
 **$p = 0.278$**

## B) IBD OUTLIER LOCI

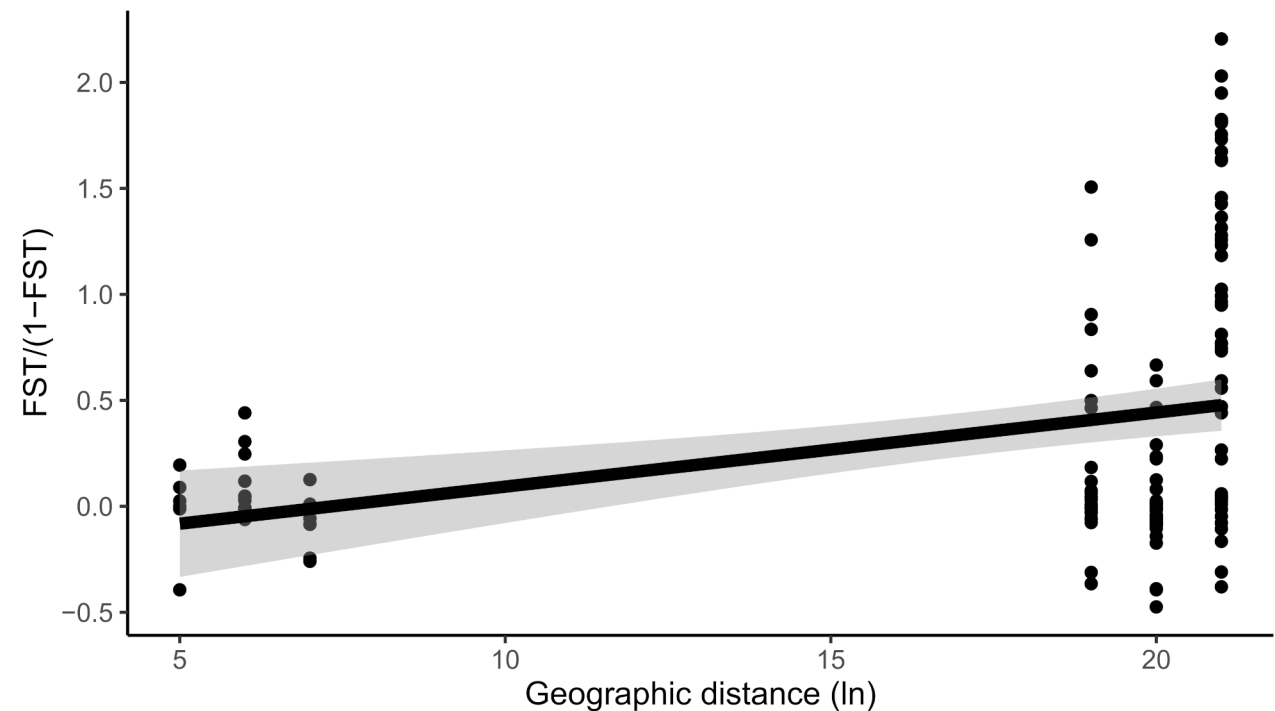

**$r = 0.0970$**   
 **$p = 0.174$**
