# Supplementary material for: Genomic assessment reveals signal of adaptive selection in populations of the Spotted rose snapper Lutjanus guttatus from the Tropical Eastern Pacific
Source: PeerJ journal article supplement (doi:10.7717/peerj.15029), 2023-03-27

**A) IBD NEUTRAL LOCI Northern Group**

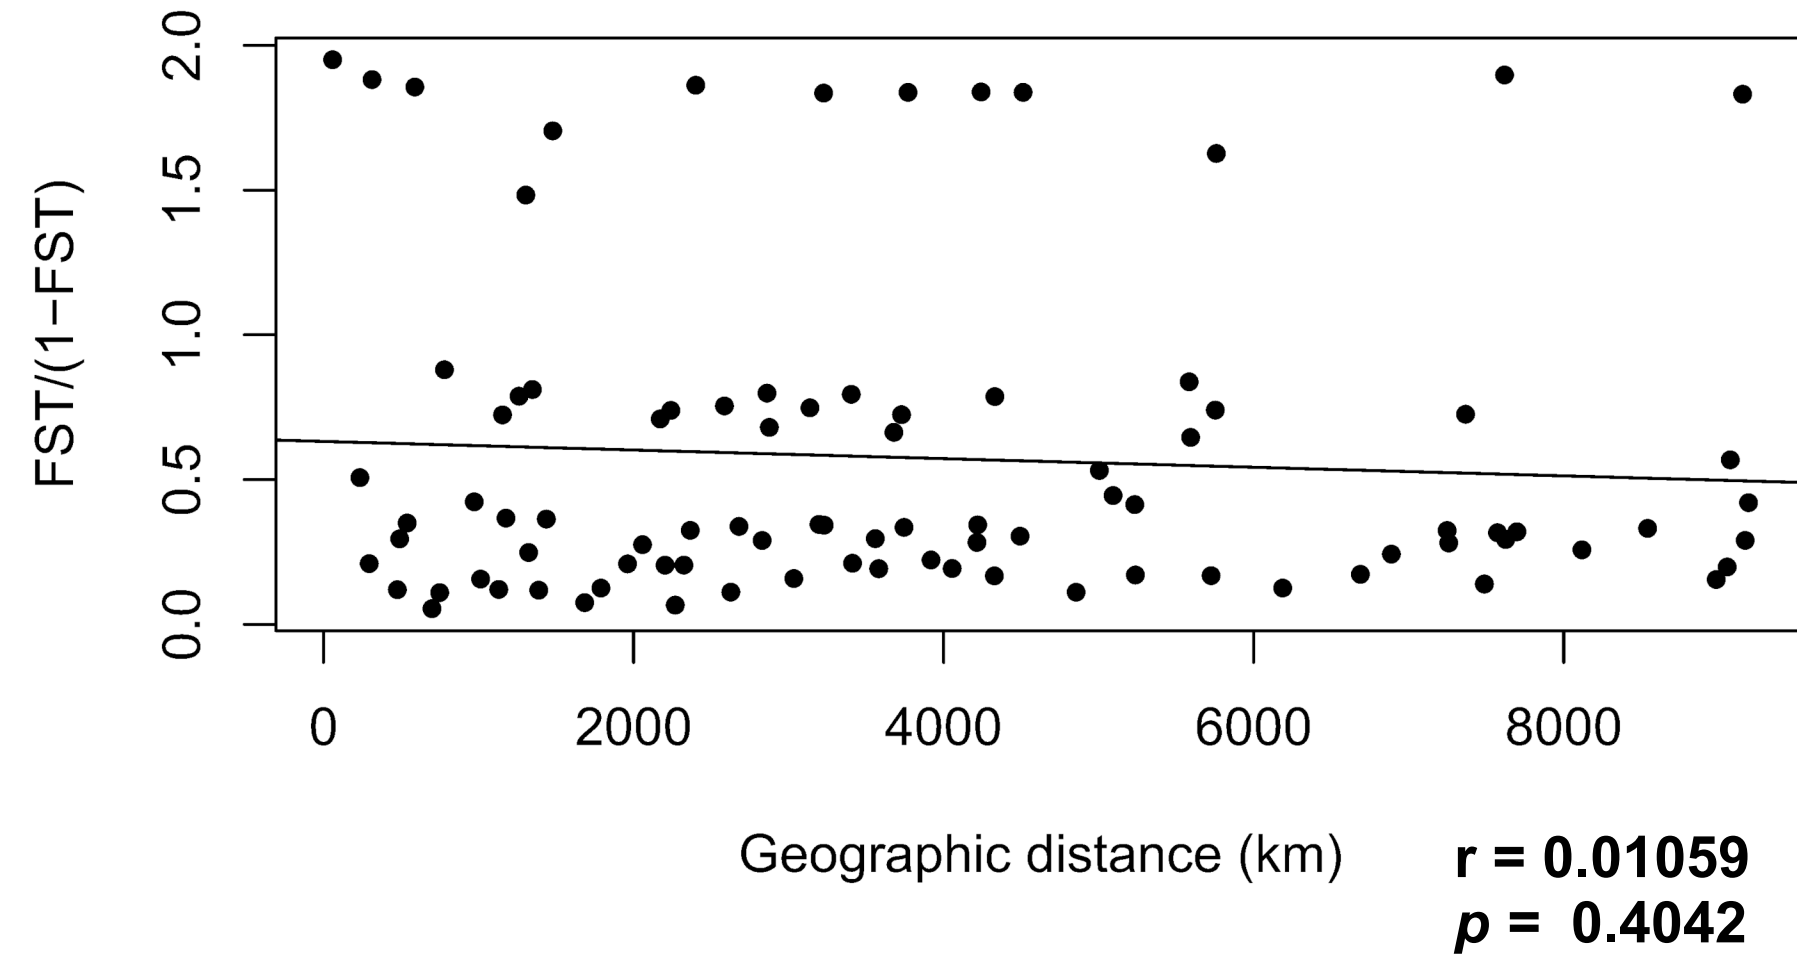

**B) IBD NEUTRAL LOCI Southern Group**

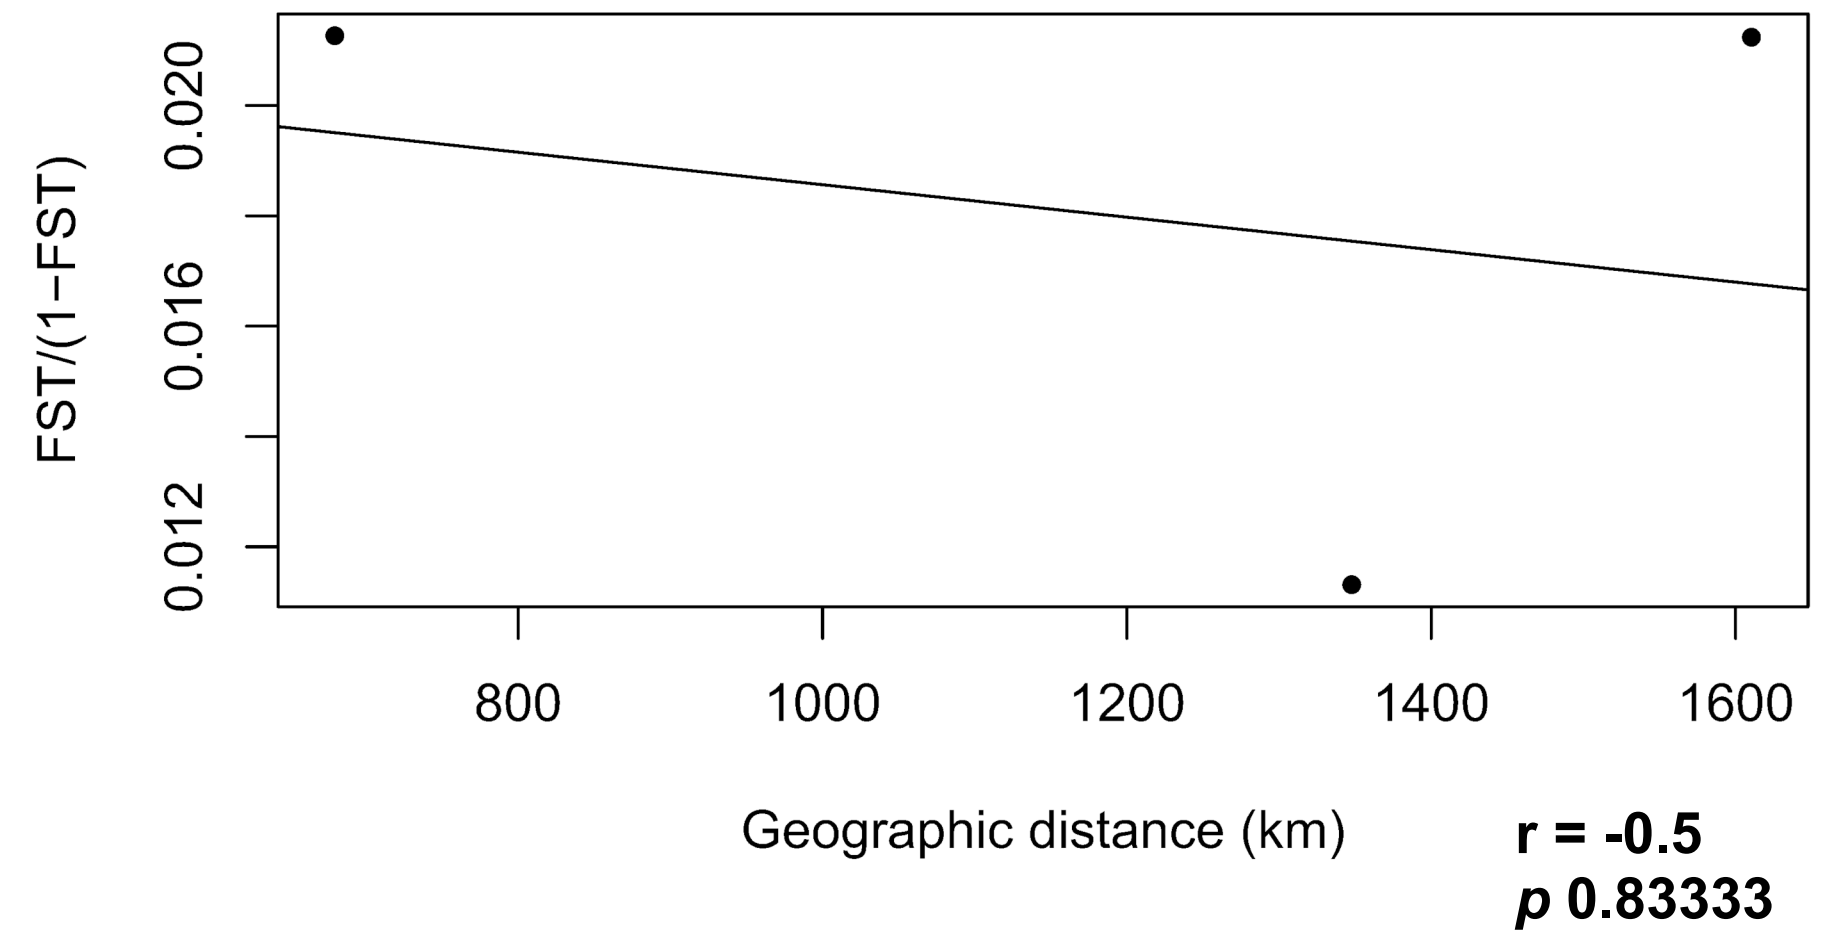

**C) IBD OUTLIER LOCI Northern Group**

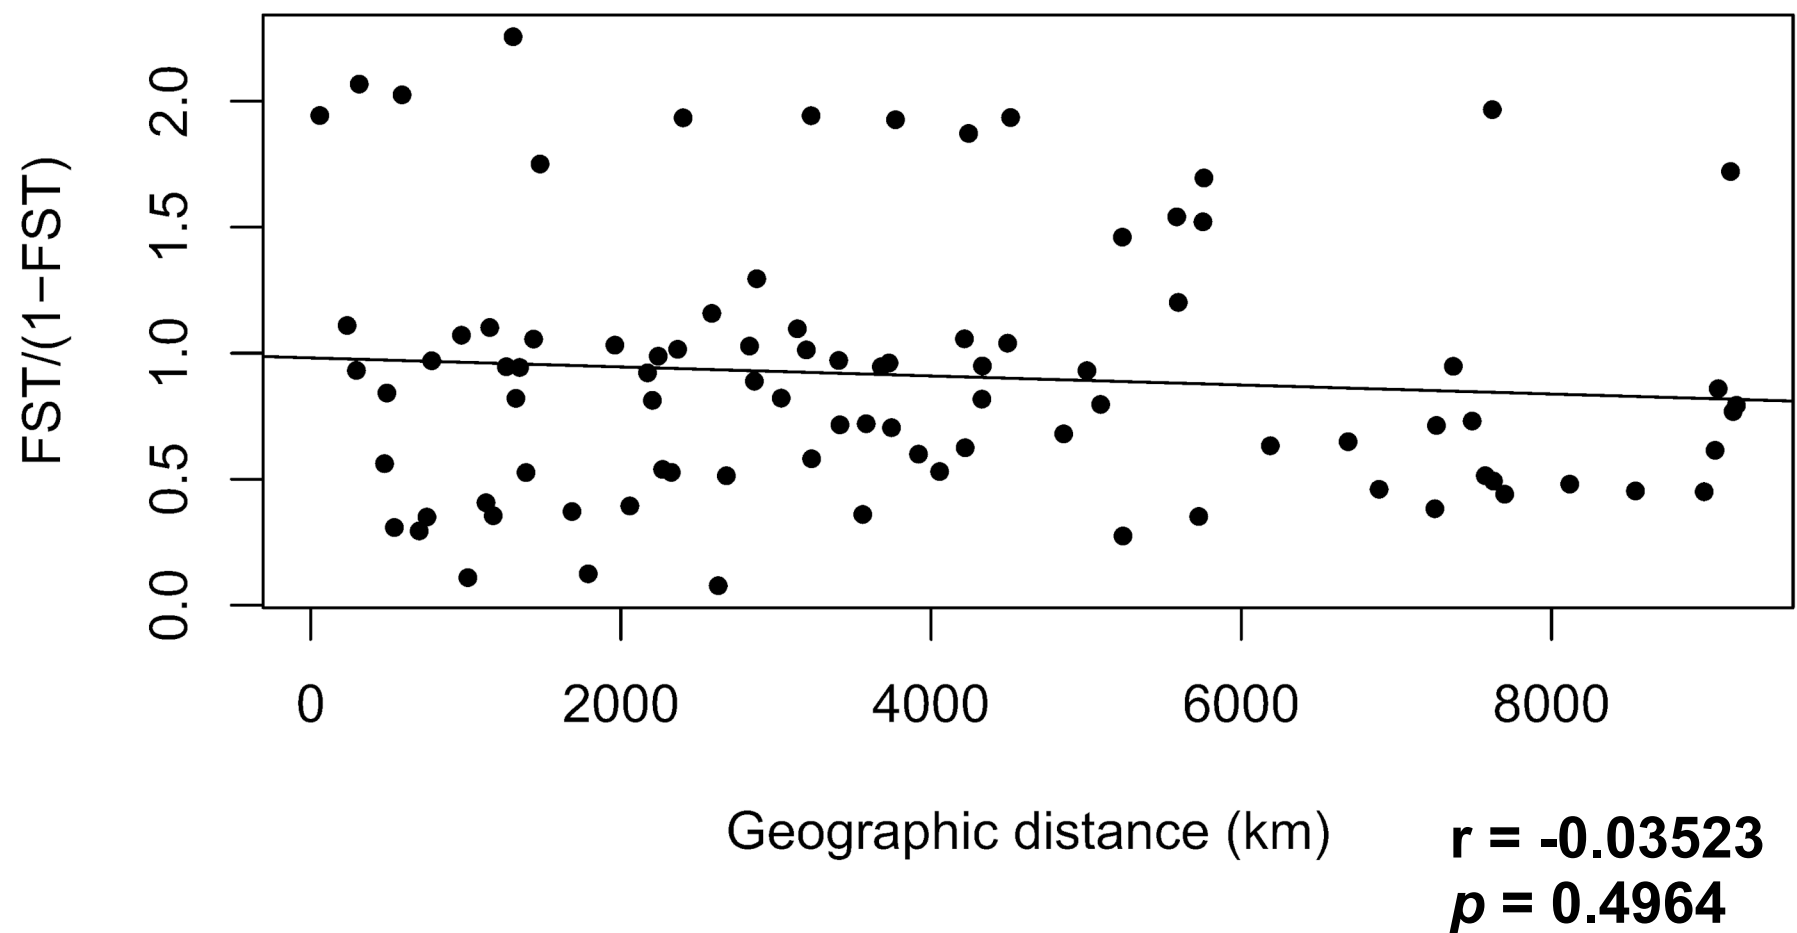

**D) IBD OUTLIER LOCI Southern Group**

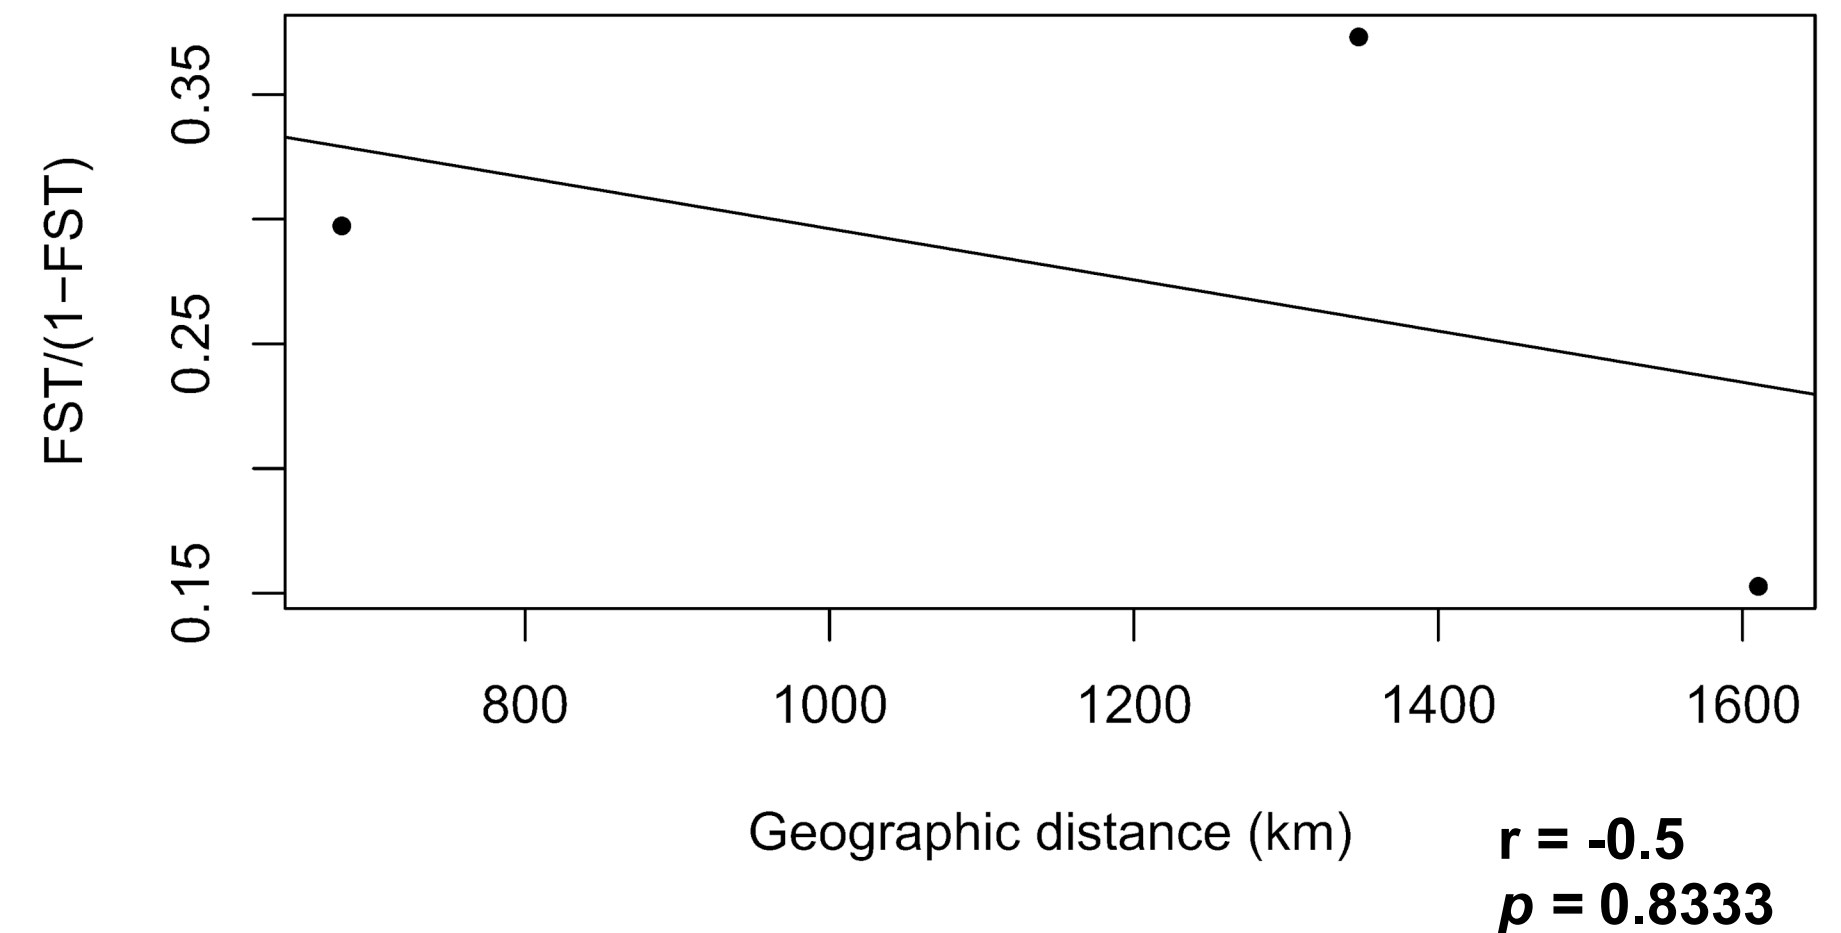

Supplement: FigS5.pdf [file FigS5.pdf]
