# Supplementary material for: Genomic assessment reveals signal of adaptive selection in populations of the Spotted rose snapper Lutjanus guttatus from the Tropical Eastern Pacific
Source: PeerJ journal article supplement (doi:10.7717/peerj.15029), 2023-03-27

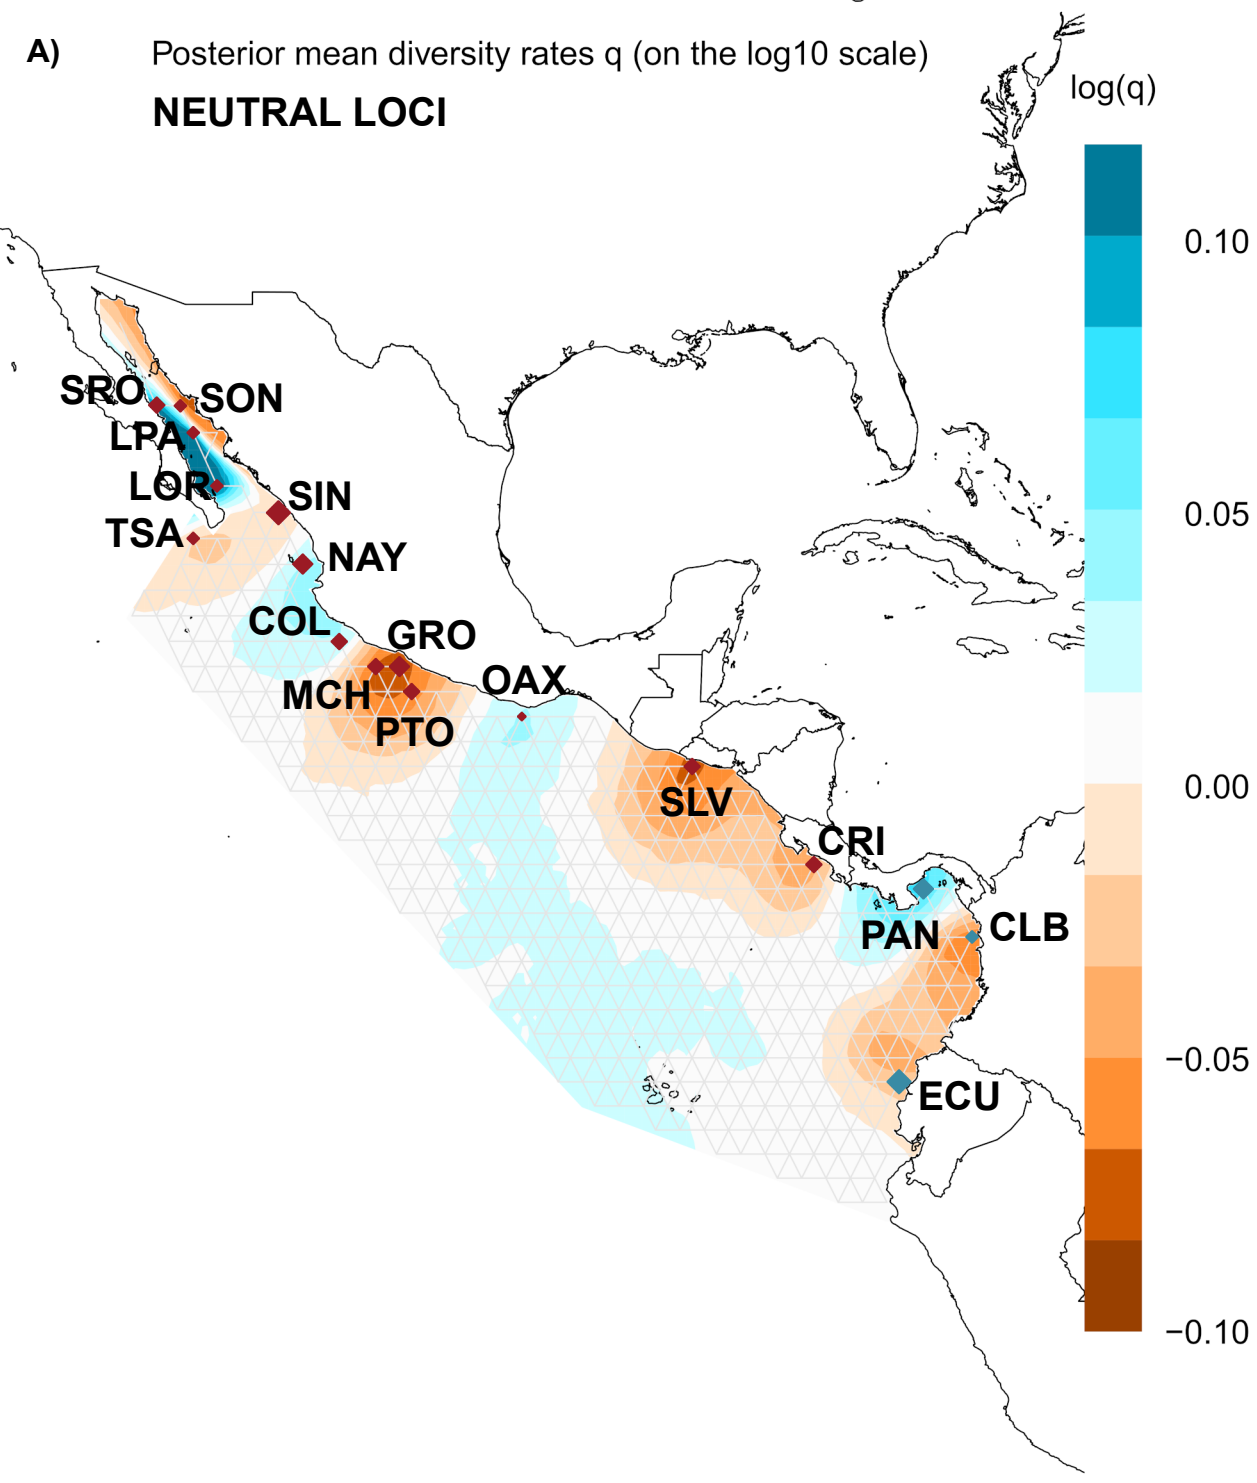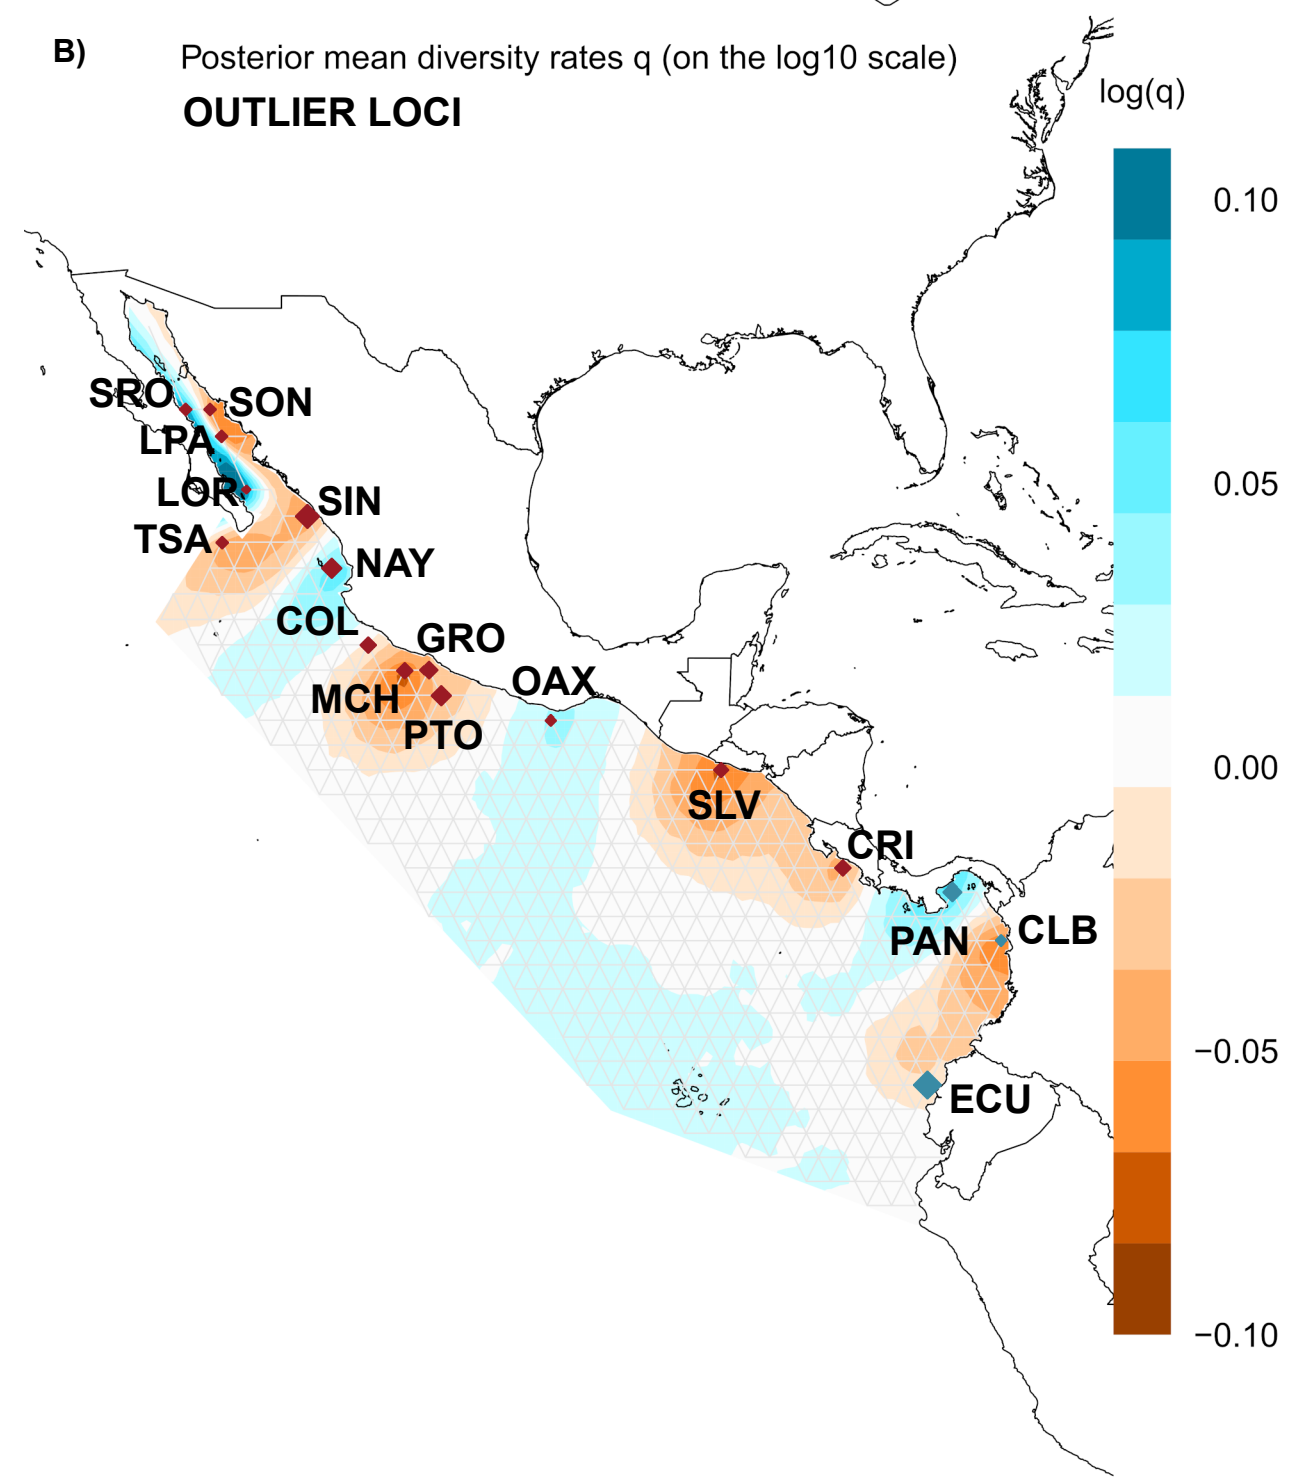

Supplement: FigS7.pdf [file FigS7.pdf]
